# Supplementary material for: Genome-Wide Analysis of Invertase Gene Family, and Expression Profiling under Abiotic Stress Conditions in Potato
Source: MDPI journal article supplement (doi:10.3390/biology11040539), 2022-03-31
Supplement: s1 [file s1]

*Supplementary Material*

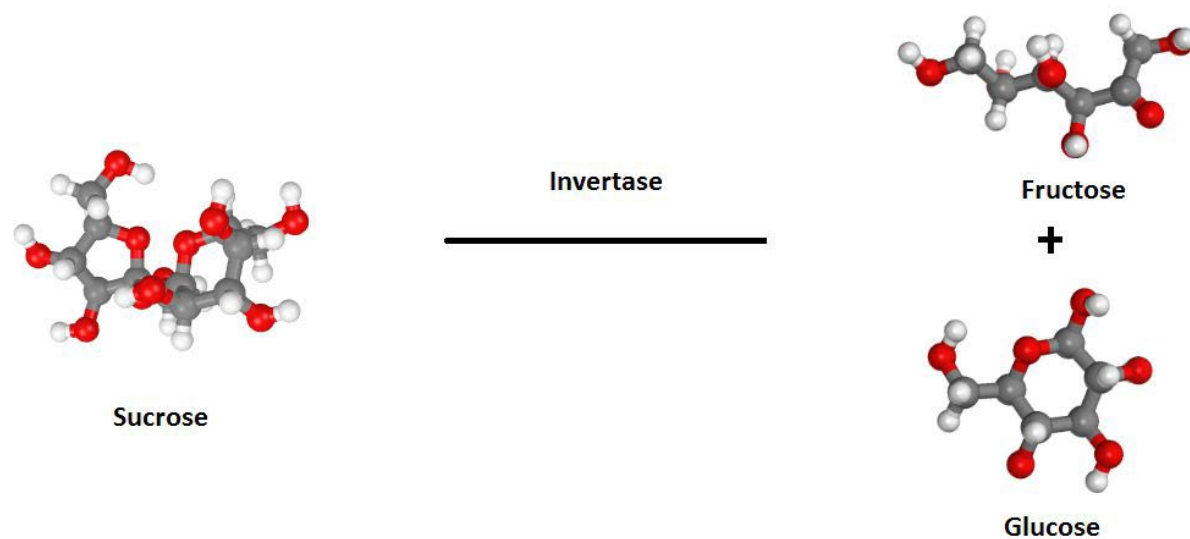

Figure S1. Equation showing 3-dimensional structures of sucrose, glucose, fructose and cleavage of sucrose in to glucose and fructose under the catalytic action of invertase

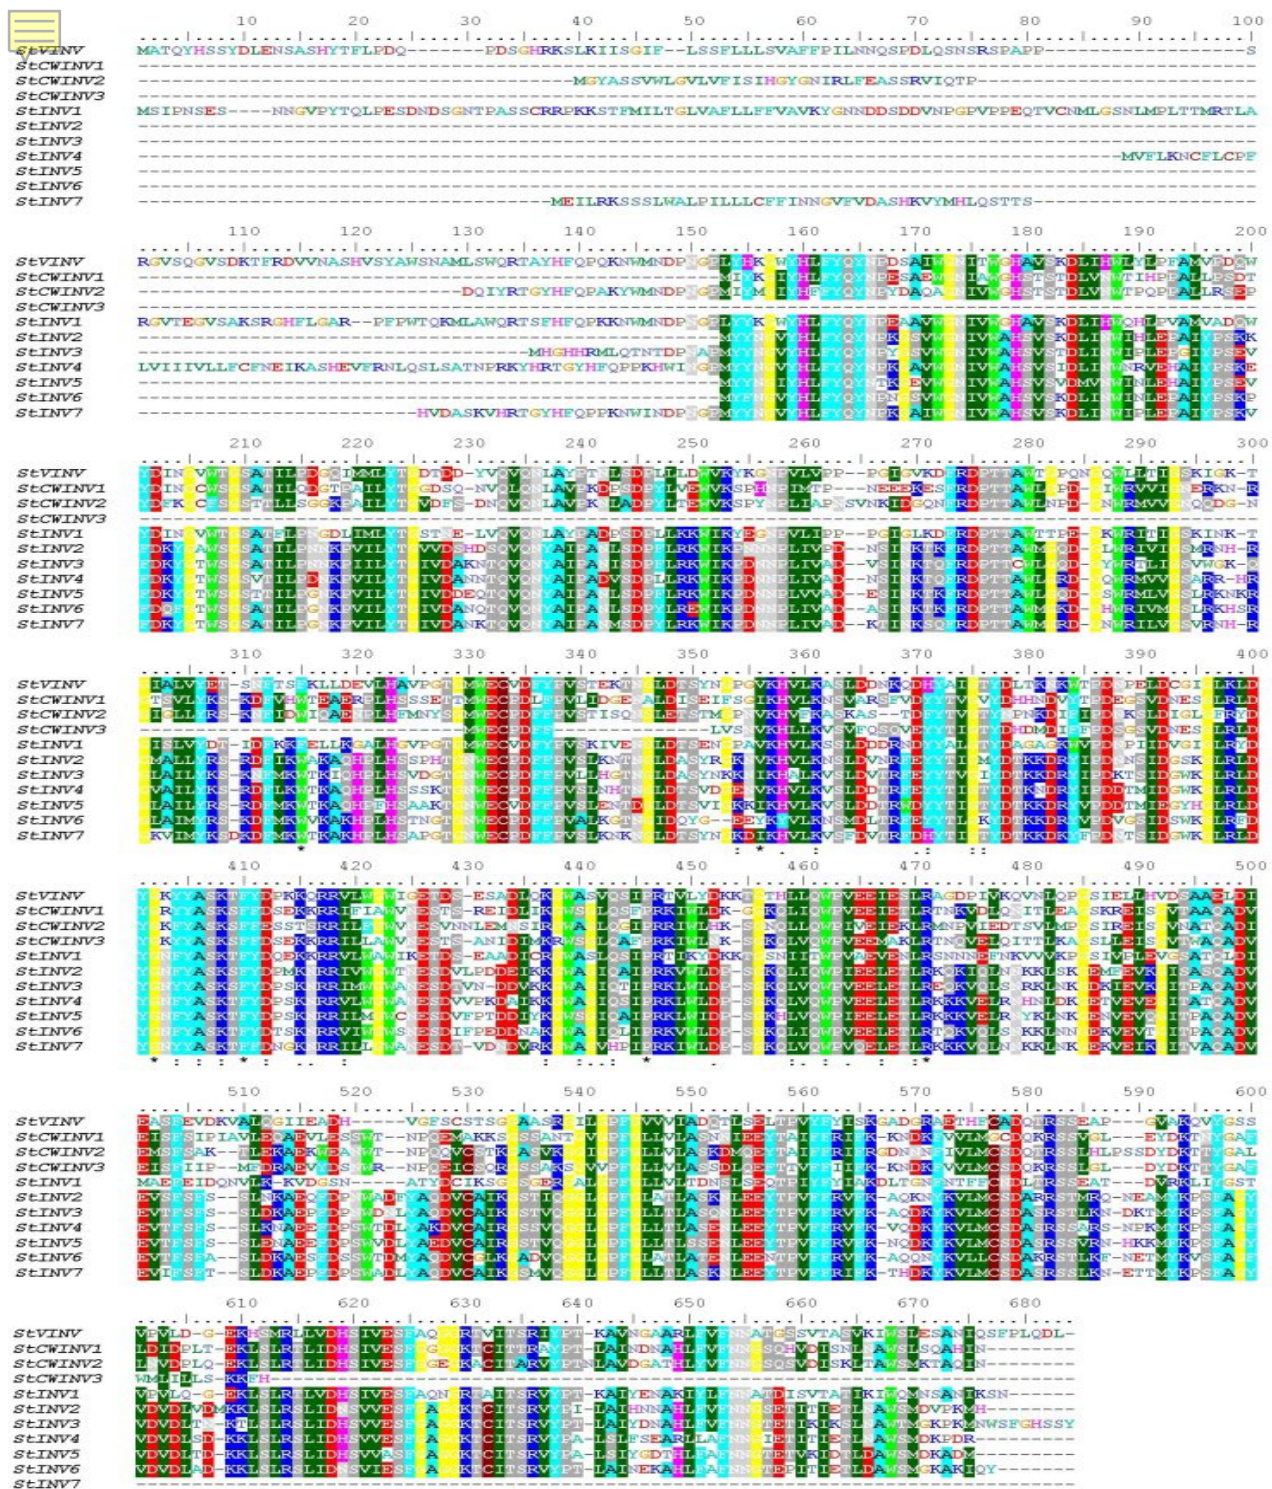

Figure S2. Multiple alignment of sub-family Acid invertases in *Solanum tuberosum*. Fully conserved regions are represented by (\*), Regions conserved between the groups which are highly similar in properties are represented by (:), (.) represents the conservation between groups having low similarities in properties.



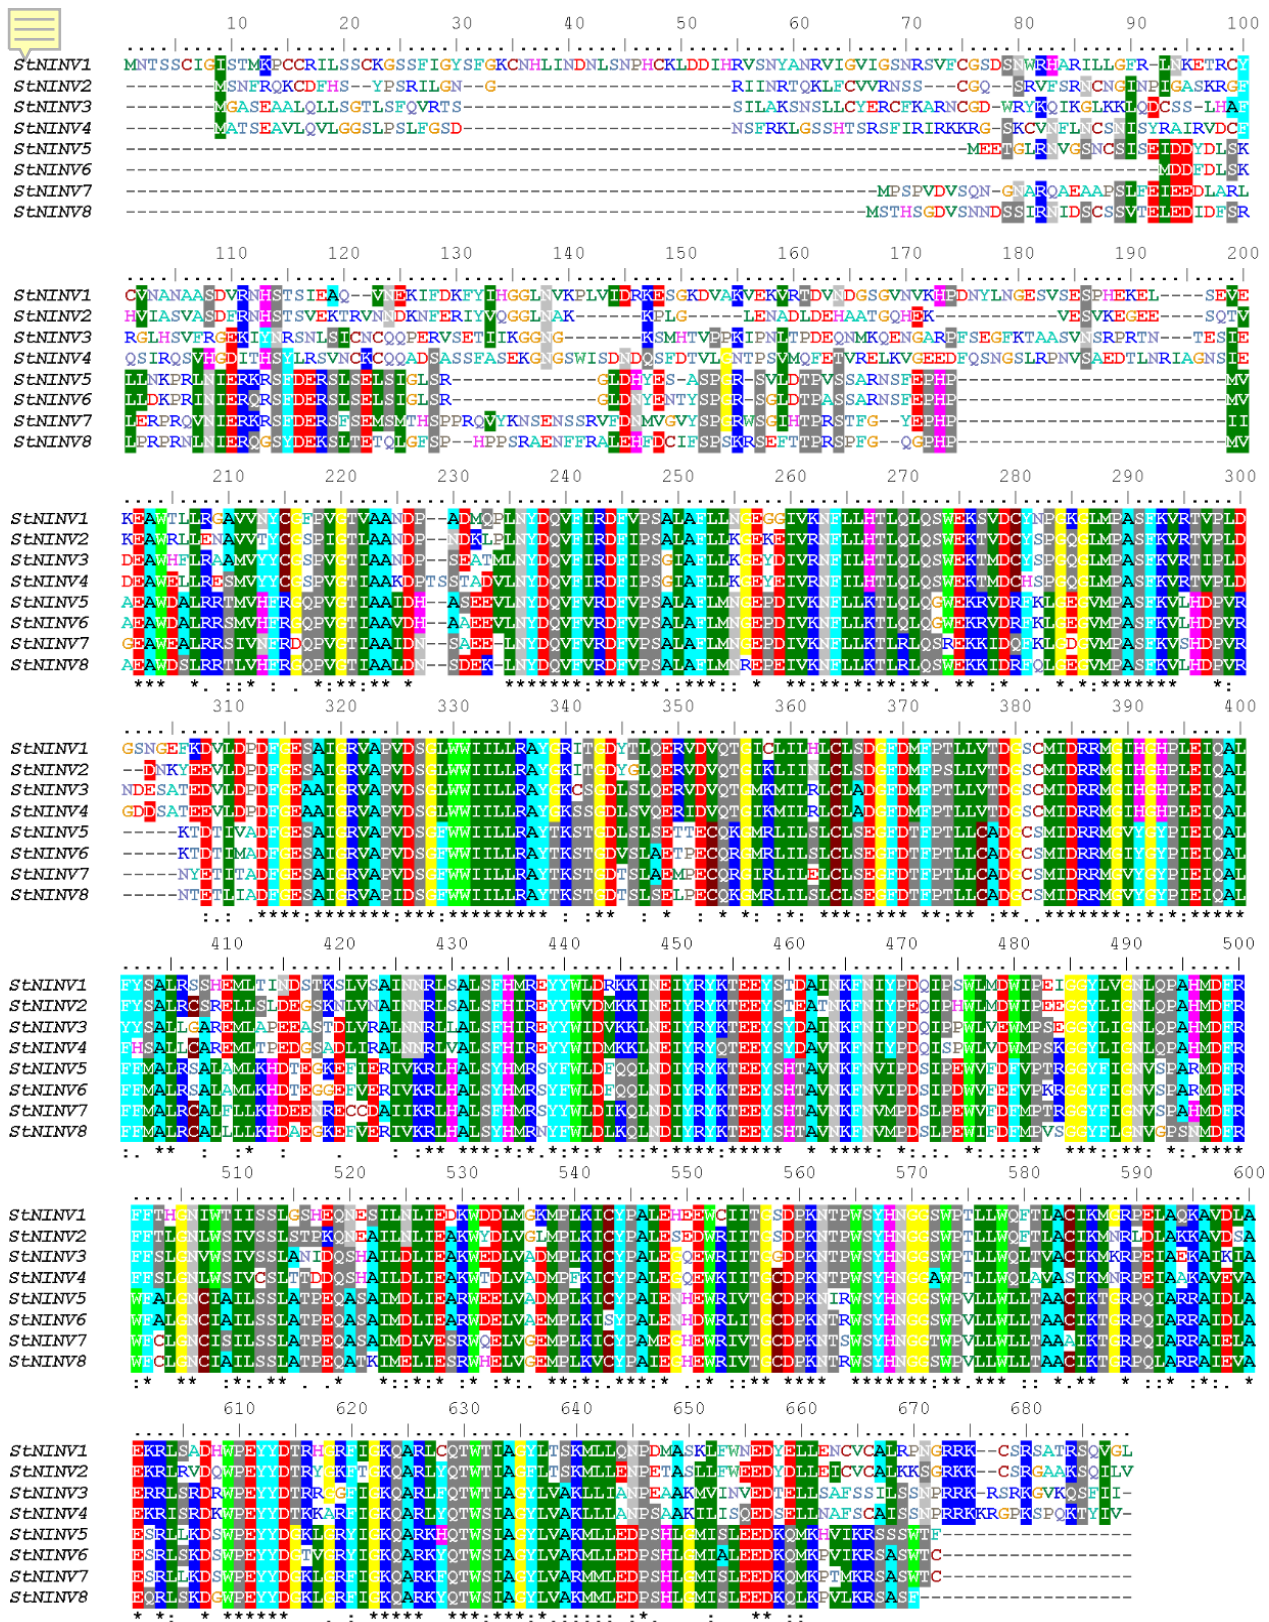

Figure S3. Multiple alignment of sub-family Neutral/Alkaline invertases in *Solanum tuberosum*. Fully conserved regions are represented by (\*), Regions conserved between the groups which are highly similar in

properties are represented by (:), (.) represents the conservation between groups having low similarities in properties.

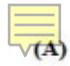

(A)

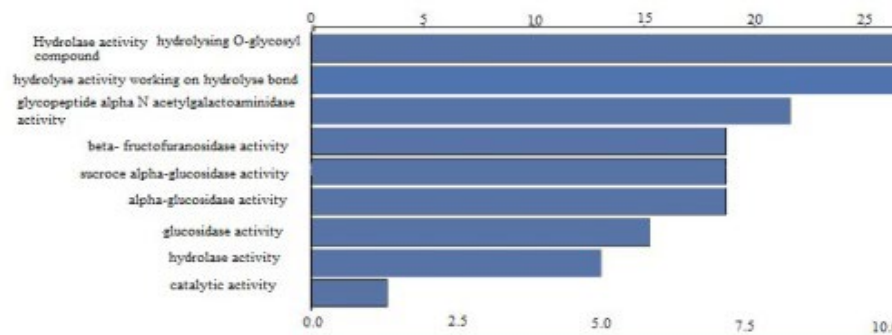

(B)

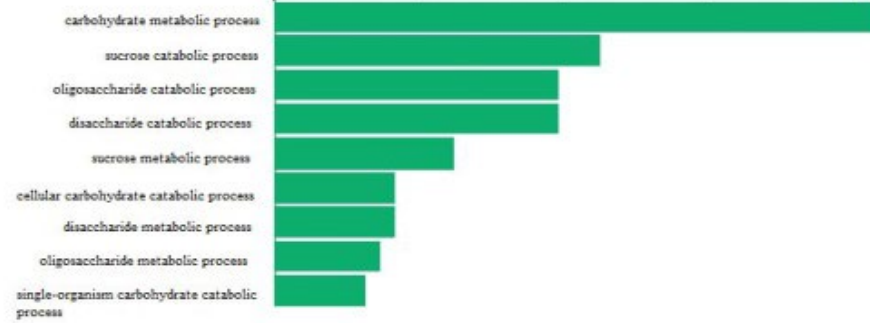

(C)

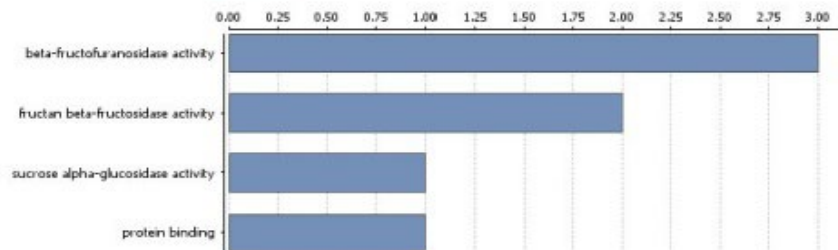

(D)

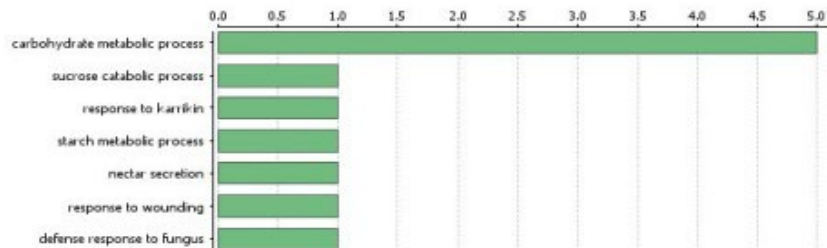

(E)

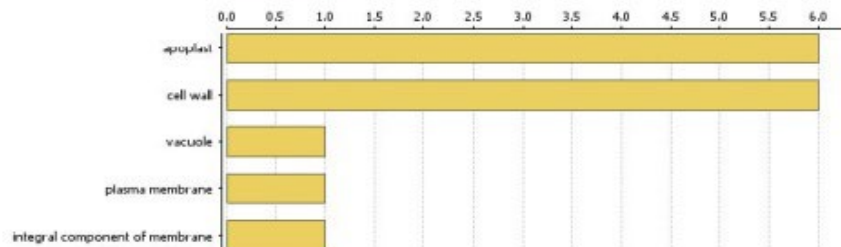

**Figure S4. Gene ontology annotation of invertase proteins.** (A) and (B) are showing gene annotation in potato. (B) (C) and (D) shows gene annotation using *Arabidopsis thaliana* as reference organism.

**Table S1.** Coding region nucleotide (upper portion of matrix) and amino acid (bottom portion of matrix) sequence pairwise comparison (%) identity) between *Solanum tuberosum* acid invertase sub-family genes.

|              | StVINV | StINV1 | StINV6 | StINV4 | StINV5 | StINV7 | StINV2 | StINV3 | StCWINV2 | StCWINV1 | StCWINV3 | 1: |
|--------------|--------|--------|--------|--------|--------|--------|--------|--------|----------|----------|----------|----|
| StVINV       | –      | 60.71  | 43.09  | 42.98  | 43.09  | 43.84  | 44.51  | 42.45  | 42.58    | 43.51    | 36.76    |    |
| 2: StINV1    | 60.71  | –      | 43.78  | 43.27  | 43.37  | 44.42  | 45.40  | 42.55  | 42.50    | 44.60    | 38.10    |    |
| 3: StINV6    | 43.09  | 43.78  | –      | 74.85  | 73.33  | 77.21  | 76.67  | 76.08  | 48.91    | 53.29    | 47.08    |    |
| 4: StINV4    | 42.98  | 43.27  | 74.85  | –      | 81.21  | 75.66  | 78.08  | 76.53  | 47.24    | 53.78    | 50.97    |    |
| 5: StINV5    | 43.09  | 43.37  | 73.33  | 81.21  | –      | 76.27  | 75.15  | 77.25  | 48.42    | 51.79    | 48.25    |    |
| 6: StINV7    | 43.84  | 44.42  | 77.21  | 75.66  | 76.27  | –      | 77.30  | 78.98  | 49.91    | 55.18    | 52.34    |    |
| 7: StINV2    | 44.51  | 45.40  | 76.67  | 78.08  | 75.15  | 77.30  | –      | 78.47  | 51.08    | 53.08    | 47.86    |    |
| 8: StINV3    | 42.45  | 42.55  | 76.08  | 76.53  | 77.25  | 78.98  | 78.47  | –      | 49.14    | 54.58    | 51.17    |    |
| 9: StCWINV2  | 42.58  | 42.50  | 48.91  | 47.24  | 48.42  | 49.91  | 51.08  | 49.14  | –        | 60.04    | 55.47    |    |
| 10: StCWINV1 | 43.51  | 44.60  | 53.29  | 53.78  | 51.79  | 55.18  | 53.08  | 54.58  | 60.04    | –        | 68.99    |    |
| 11: StCWINV3 | 36.76  | 38.10  | 47.08  | 50.97  | 48.25  | 52.34  | 47.86  | 51.17  | 55.47    | 68.99    | –        |    |

**Table S2.** Coding region nucleotide (upper portion of matrix) and amino acid (bottom portion of matrix) sequence pairwise comparison (% identity) between *Solanum tuberosum* Neutral/Alkaline invertase sub-family genes.

|            | StNINV8 | StNINV7 | StNINV5 | StNINV6 | StNINV3 | StNINV4 | StNINV1 | StNINV2 |
|------------|---------|---------|---------|---------|---------|---------|---------|---------|
| 1: StNINV8 | –       | 76.28   | 78.90   | 78.83   | 51.79   | 51.13   | 51.73   | 52.93   |
| 2: StNINV7 | 76.28   | –       | 78.43   | 79.66   | 51.88   | 51.88   | 51.91   | 52.45   |
| 3: StNINV5 | 78.90   | 78.43   | –       | 92.51   | 53.54   | 52.96   | 53.52   | 52.10   |
| 4: StNINV6 | 78.83   | 79.66   | 92.51   | –       | 54.94   | 53.29   | 54.37   | 54.04   |
| 5: StNINV3 | 51.79   | 51.88   | 53.54   | 54.94   | –       | 69.26   | 58.12   | 62.24   |
| 6: StNINV4 | 51.13   | 51.88   | 52.96   | 53.29   | 69.26   | –       | 57.41   | 61.09   |
| 7: StNINV1 | 51.73   | 51.91   | 53.52   | 54.37   | 58.12   | 57.41   | –       | 70.25   |
| 8: StNINV2 | 52.93   | 52.45   | 52.10   | 54.04   | 62.24   | 61.09   | 70.25   | –       |

#### S4 Primers Used

|                 |                         |
|-----------------|-------------------------|
| <b>CwINV1 F</b> | ATAGTATTAGAGGATGGGCTGGT |
| <b>CwINV1 R</b> | CCTGCGTAGCATTGACTCC     |
| <b>CwINV3 F</b> | TAAAAATAGCGTGGCTCGTT    |
| <b>CwINV3 R</b> | AAAAGACTTGGAAGCATAATACC |
| <b>INV1 F</b>   | CGACCCATCGGACCCTC       |
| <b>INV1 R</b>   | AAAATCCACACATTCCCACATAC |
| <b>INV7 F</b>   | CAAACACCCACTCCACTCAG    |
| <b>INV7 R</b>   | TTCCATCCATCAATAGAAGTGTT |
| <b>NINV1 F</b>  | ATTTTGTCCCATCGGCTCT     |
| <b>NINV1 R</b>  | AGTCCCCTGTAATCCTTCC     |

|                |                           |  |
|----------------|---------------------------|--|
| <b>NINV2 F</b> | AAATCTGTGGTCCATTGTGTCA    |  |
| <b>NINV2 R</b> | TGTGTTCTTGGGGTCGCTA       |  |
| <b>VINV F</b>  | CATCAAAGACATTTTATGACCCGAA |  |
| <b>VINV R</b>  | TGTGTCCCTGTCTTCTTGTCGTAA  |  |
